# Supplementary material
Source: Springer Nature journal article supplement (https://www.springermedizin.de/resource/supplementary/12955_2012_1122_MOESM1_ESM.pdf/9559332)
Supplement: MOESM1 [file 9559332]

1. Subjects interviewed on the Patient Generated Index and domains important to MS identified

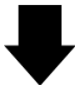

2. Domains classified using the International Classification of Functioning, Disability and Health (ICF)

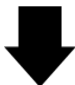

3. Domains mapped onto the HUI2, HUI3, EQ-5D and SF-6D
